# Supplementary material for: Making the invisible visible: a systematic review of sexual minority women’s health in Southern Africa
Source: BMC Public Health. 2016 Apr 11;16:307. doi: 10.1186/s12889-016-2980-6 (PMC4827176; doi:10.1186/s12889-016-2980-6)
Supplement: Additional file 1: — Overview of reviewed journal articles and key findings. Table of reviewed journal articles, with information on country, demographics, and key findings. (PDF 321 kb) [file 12889_2016_2980_MOESM1_ESM.pdf]

Additional file 1

| Author                              | Sample                                                                          | Data collection method                                                                  | Demographic information                                                                                                              | Sexual health | Mental health                                                                                                                                                              | Violence                                                                                                                                             | Other findings                                                                                                                                          | Risk of bias/ Quality |
|-------------------------------------|---------------------------------------------------------------------------------|-----------------------------------------------------------------------------------------|--------------------------------------------------------------------------------------------------------------------------------------|---------------|----------------------------------------------------------------------------------------------------------------------------------------------------------------------------|------------------------------------------------------------------------------------------------------------------------------------------------------|---------------------------------------------------------------------------------------------------------------------------------------------------------|-----------------------|
| Butler & Astbury, 2008 [44]         | 18 self-identified gay or lesbian youth in South Africa                         | QUAL<br>Semi-structured interviews                                                      | Age 16 – 21 years<br><br>5 black, 2 'coloured', 2 indian, 4 white<br><br>4 lesbian women                                             |               | Participants 'covered up' and denied their sexuality, withdrew physically and socially, acted as if they were straight, remained silent regarding their sexual orientation |                                                                                                                                                      |                                                                                                                                                         | Quality unclear       |
| Ehlers et al. 2001 [32]             | 47 gay men, lesbian women & bisexual men and women in Botswana                  | QUANT<br>Self-administered questionnaire                                                | 47% between 20 and 29 years<br><br>No info on racial composition<br><br>79% employed, 10% students<br><br>5 lesbian & bisexual women |               | 30% reported suicidal thoughts at some stage, 30% on-going suicidal thoughts<br><br>64% reported drinking more than 2 drinks a day                                         | 11% had been sexually assaulted (no info on gender)                                                                                                  | Only 15% of GLBs did disclose their sexual orientation to health care provider                                                                          | Risk of bias unclear  |
| Kowen & Davis, 2006 [43]            | 11 lesbian youth in South Africa (Cape Town)                                    | QUAL<br>In-depth interviews                                                             | 7 Xhosa (black) youth aged 16-24 years<br><br>4 English (white) youth aged 16-19 years                                               |               | Lesbian youth regularly face social isolation and rejection but are highly resilient                                                                                       |                                                                                                                                                      |                                                                                                                                                         | Quality unclear       |
| Matebeni et al. 2013 [42]           | 24 self-identifying lesbians living with HIV in South Africa, Namibia, Zimbabwe | QUAL<br>In-depth interviews                                                             | Age between 22 and 48 years<br><br>No info on racial composition<br><br>7 participants in full-time employment                       |               |                                                                                                                                                                            | 8 out of 24 women (1/3) had been raped                                                                                                               | Lack of knowledge about HIV transmission, risk and protection                                                                                           | Quality high          |
| Mavhandu-Mudzusi & Sandy, 2015 [41] | 20 LGBT students from rural SA university (5 lesbian and 3 bisexual women)      | QUAL<br>Semi-structured interviews using Interpretative Phenomenological Analysis (IPA) | Age 19 – 25 years<br><br>No information about race or SES                                                                            |               | Students stressed that homophobic labelling, stigma and discrimination led to suicidal ideation and suicide attempts                                                       | Lesbian students recounted threats of sexual violence to 'correct' their sexuality<br><br>Students shared threats of murder by heterosexual students | Religion-based prejudice led to stigma and discrimination of LGBT students by university staff (admin and lecturers) students and health care providers | Quality unclear       |

Additional file 1

| Author                   | Sample                                                                                     | Data collection method                                                                                | Demographic information                                                                               | Sexual health                                                                                                                                              | Mental health                                                                                                       | Violence                                                                 | Other findings                                                                                                                                                                                         |                      |
|--------------------------|--------------------------------------------------------------------------------------------|-------------------------------------------------------------------------------------------------------|-------------------------------------------------------------------------------------------------------|------------------------------------------------------------------------------------------------------------------------------------------------------------|---------------------------------------------------------------------------------------------------------------------|--------------------------------------------------------------------------|--------------------------------------------------------------------------------------------------------------------------------------------------------------------------------------------------------|----------------------|
| Miller et al. 2013 [33]  | 830 South African youth (14 – 19 years old), 29 identify as lesbian, gay or bisexual (LGB) | QUANT<br>Cross-sectional survey that focused on socio-behavioural characteristics, HIV status and SRH | Median age 17 years<br><br>No further demographic information                                         | Self-reported HIV prevalence 13.8% of LGB identified youth (n=29), not disaggregated by gender                                                             |                                                                                                                     |                                                                          |                                                                                                                                                                                                        | Risk of bias unclear |
| Muranda et al. 2014 [40] | 54 WSW from Namibia, Kenya, Zimbabwe, Nigeria, Ghana, South Africa                         | QUAL<br>Feminist virtual ethnography or 'internetography'                                             | No demographic information                                                                            | 35% felt they were at risk for HIV/STIs<br><br>'Some' WSW engage in high-risk sexual behaviour which places them at an increased risk for HIV transmission |                                                                                                                     |                                                                          | More than 50% had not visited a clinic or consulted with a healthcare worker on sexual health.<br><br>46% did not know where to get information regarding safe sex/ barrier methods for sex with women | Quality unclear      |
| Nel & Judge 2008 [34]    | 487 lesbian and gay (86%) or bisexual (14%) respondents in South Africa                    | QUANT<br>Self-administered questionnaire                                                              | 46% between 15 and 24 years; 48% between 25 and 40 years<br><br>52% identified as black, 41% as white |                                                                                                                                                            | 37% of respondents feared violence on account of their sexual orientation, which lead to increased suicide ideation | 37% had experienced verbal abuse, 16% physical abuse and 8% sexual abuse | Fear of discrimination can lead to the avoidance or delaying of accessing healthcare services and/or criminal justice services                                                                         | Risk of bias unclear |
| Polders et al. 2008 [35] | 385 gay and lesbian people (51.1% lesbian women) in Gauteng, South Africa                  | QUANT<br>Self-administered questionnaire                                                              | Mean age 25 years (range 16 – 40)<br><br>79% identified as black, 21% as white<br><br>15% unemployed  |                                                                                                                                                            | Self-esteem and hate speech had strongest influence on vulnerability to depression                                  |                                                                          |                                                                                                                                                                                                        | Risk of bias unclear |

Additional file 1

| Author                    | Sample                                                                   | Data collection method                                                              | Demographic information                                                                                                                                      | Sexual health                                                                                                                                    | Mental health                                                               | Violence                                                                                                                                                                                                                 | Other findings                                                                                                                                                                                             |                               |
|---------------------------|--------------------------------------------------------------------------|-------------------------------------------------------------------------------------|--------------------------------------------------------------------------------------------------------------------------------------------------------------|--------------------------------------------------------------------------------------------------------------------------------------------------|-----------------------------------------------------------------------------|--------------------------------------------------------------------------------------------------------------------------------------------------------------------------------------------------------------------------|------------------------------------------------------------------------------------------------------------------------------------------------------------------------------------------------------------|-------------------------------|
| Poteat et al. 2014 [38]   | 271 WSW in Lesotho                                                       | QUANT & QUAL<br>Structured questionnaire (n=250),<br>Focus group discussions (n=21) | Mean age 24 years (range 18-52)<br><br>98% ethnic Basotho<br><br>One third currently employed, 64% had received tertiary or vocational school education      | Self-reported HIV prevalence 8%<br><br>76% had regular female partner, 43% had regular male partner<br><br>12% had had pap smear in past 2 years |                                                                             |                                                                                                                                                                                                                          | Self-reported HIV infection significantly associated with having concurrent female and male partners<br><br>Only 25% of participating women had disclosed their same-sex behaviour to a health care worker | Risk of bias/ quality unclear |
| Sandfort et al. 2015 [31] | 591 biologically female WSW in South Africa, Namibia, Botswana, Zimbabwe | QUANT<br>Self-administered questionnaire, community-based                           | Mean age 26 years (range 18-65)<br><br>79% identified as black, 12% 'coloured', 6% white, 3% indian                                                          |                                                                                                                                                  | Forced sex increased drug use, mental distress and lower sense of belonging | 31% of participants reported that they experienced forced sex at least once                                                                                                                                              |                                                                                                                                                                                                            | Risk of bias unclear          |
| Sandfort et al. 2013 [30] | 591 biologically female WSW in South Africa, Namibia, Botswana, Zimbabwe | QUANT<br>Self-administered questionnaire, community-based                           | Mean age 26 years (range 18-65)<br><br>79% identified as black, 12% 'coloured', 6% white, 3% indian – representative of SA<br><br>52% without regular income | HIV prevalence 9.6% (self-reported)<br><br>47% had consensual sex with men                                                                       | 50.1% had used recreational drugs                                           | 31% of participants reported that they experienced forced sex at least once (14.9% reported forced sex by men only; 6.6% reported forced sex by women only; and 9.6% had forced sex experiences with both men and women) |                                                                                                                                                                                                            | Risk of bias unclear          |

Additional file 1

| Author                     | Sample                                                                                   | Data collection method                                                                           | Demographic information                                                                         | Sexual health                                                  | Mental health                                                                                                                   | Violence                                                                                                                                | Other findings                                                                                                                                                                             |                      |
|----------------------------|------------------------------------------------------------------------------------------|--------------------------------------------------------------------------------------------------|-------------------------------------------------------------------------------------------------|----------------------------------------------------------------|---------------------------------------------------------------------------------------------------------------------------------|-----------------------------------------------------------------------------------------------------------------------------------------|--------------------------------------------------------------------------------------------------------------------------------------------------------------------------------------------|----------------------|
| Smith, 2014 [39]           | 22 self-identified lesbian and bisexual women in South Africa (Cape Town)                | QUAL<br>Semi-structured interviews                                                               | Average age 23 years (range 19–32)<br><br>13 identified as black, 5 as 'coloured', 4 as white   |                                                                |                                                                                                                                 |                                                                                                                                         | All women stressed lack of sexual health information, and lack of health care providers' knowledge<br><br>'Most' women would not disclose their sexual orientation to health care provider | Quality high         |
| Thurston et al. 2014 [36]  | 89 SM youth (61 women; overall sample of 818) in South Africa                            | QUANT<br>Interviewer-administered questionnaire with stratified convenience sample               | Mean age 17 years<br><br>58% identified as black, 11% as 'coloured', 5% as indian, 15% as white | 40 SM youth were sexually active (not disaggregated by gender) | SM youth (69% SM women) showed higher levels of depression, traumatic stress and substance use than heterosexual matched peers. | SM youth (69% SM women) had experienced higher levels of partner-perpetrated violence than heterosexual matched peers.                  |                                                                                                                                                                                            | Risk of bias unclear |
| Wells & Polders, 2006 [37] | 487 self-identified gay, lesbian and bisexual people from Gauteng province, SA (45% SMW) | QUANT<br>Self-administered questionnaire (closed-ended questions), stratified by race and gender | Mean age 27 years (range 16-59)<br><br>74% black SMW, 24% white SMW                             |                                                                |                                                                                                                                 | 36/40% (Black/White) SMW had experienced hate speech; 16/15% physical abuse/ assault; 10/4% sexual abuse/ rape; 17/8% domestic violence | Black SMW were more likely to experience violence in public spaces, and less likely to report homophobic violence to the police                                                            | Risk of bias unclear |

QUAL = qualitative methodology; QUANT = quantitative methodology
