# Supplementary material for: Making the invisible visible: a systematic review of sexual minority women’s health in Southern Africa
Source: Springer Nature journal article supplement (doi:10.1186/s12889-016-2980-6), 2016-04-11
Supplement: MOESM3 [file 10026868]

Additional File 2: Full search details

Search carried out in Pubmed for search range 01 January 2000 to 31 January 2015.

Search date 07 February 2015

| <b>#</b> | <b>Searchers</b>                            | <b>Results</b> |
|----------|---------------------------------------------|----------------|
| 1        | "homosexuality, female"[MeSH Terms]         | 2,415          |
| 2        | "homosexuality"[All Fields]                 | 12,091         |
| 3        | "female"[All Fields]                        | 3,633,357      |
| 4        | 2 AND 3                                     | 5,574          |
| 5        | "female homosexuality"[All Fields]          | 2,418          |
| 6        | "lesbian"[All Fields]                       | 2,866          |
| 7        | 1 OR 4 OR 5 OR 6                            | 6,519          |
| 8        | "bisexuality"[MeSH Terms]                   | 2,069          |
| 9        | "bisexuality"[All Fields]                   | 2,148          |
| 10       | "bisexual"[All Fields]                      | 3,272          |
| 11       | 8 OR 9 OR 10                                | 3,913          |
| 12       | "women who have sex with women"[All Fields] | 100            |
| 13       | 7 OR 11 OR 12                               | 8,347          |
| 14       | "hiv"[MeSH Terms]                           | 51,818         |
| 15       | "hiv"[All Fields]                           | 187,668        |
| 16       | 14 OR 15                                    | 187,668        |
| 17       | "depressive disorder"[MeSH Terms]           | 51,006         |
| 18       | "depressive"[All Fields]                    | 81,142         |
| 19       | "disorder"[All Fields]                      | 316,676        |
| 20       | 18 AND 19                                   | 58,022         |
| 21       | "depressive disorder"[All Fields]           | 51,718         |
| 22       | "depression"[All Fields]                    | 168,089        |
| 23       | "depression"[MeSH Terms]                    | 53,381         |
| 24       | 17 OR 20 OR 21 OR 22 OR 23                  | 184,317        |
| 25       | "substance use"[All Fields]                 | 17,108         |
| 26       | "substance abuse"[All Fields]               | 30,419         |
| 27       | "mental health"[All Fields]                 | 108,847        |
| 28       | "suicide"[MeSH Terms]                       | 25,214         |
| 29       | "suicide"[All Fields]                       | 34,892         |
| 30       | 28 OR 29                                    | 35,576         |
| 31       | "anxiety"[MeSH Terms]                       | 35,209         |
| 32       | "anxiety"[All Fields]                       | 105,273        |
| 33       | 31 OR 32                                    | 105,637        |
| 34       | "neoplasms"[MeSH Terms]                     | 1,306,798      |
| 35       | "neoplasms"[All Fields]                     | 1,084,257      |
| 36       | "cancer"[All Fields]                        | 1,010,610      |
| 37       | 34 OR 35 OR 36                              | 1,606,937      |
| 38       | 16 OR 24 OR 25 OR 26 OR 27 30 OR 33 OR 37   | 2,126,110      |
| 39       | "South Africa"[All Fields]                  | 43,479         |
| 40       | "Southern Africa"[All Fields]               | 2,461          |
| 41       | "africa"[MeSH Terms]                        | 109,449        |
| 42       | "africa"[All Fields]                        | 84,629         |
| 43       | 41 OR 42                                    | 147,590        |
| 44       | "namibia"[MeSH Terms]                       | 430            |
| 45       | "namibia"[All Fields]                       | 810            |

Additional File 2: Full search details

|    |                                                               |         |
|----|---------------------------------------------------------------|---------|
| 46 | 44 OR 45                                                      | 810     |
| 47 | "zambia"[MeSH Terms]                                          | 1664    |
| 48 | "zambia"[All Fields]                                          | 2594    |
| 49 | 47 OR 48                                                      | 2594    |
| 50 | "zimbabwe"[MeSH Terms]                                        | 1811    |
| 51 | "zimbabwe"[All Fields]                                        | 2928    |
| 52 | 50 OR 51                                                      | 2928    |
| 53 | "lesotho"[MeSH Terms]                                         | 132     |
| 54 | "lesotho"[All Fields]                                         | 298     |
| 55 | 53 OR 54                                                      | 298     |
| 56 | "botswana"[MeSH Terms]                                        | 815     |
| 57 | "botswana"[All Fields]                                        | 1456    |
| 58 | 56 OR 57                                                      | 1456    |
| 59 | "swaziland"[MeSH Terms]                                       | 204     |
| 60 | "swaziland"[All Fields]                                       | 386     |
| 61 | 59 OR 60                                                      | 386     |
| 62 | "mozambique"[MeSH Terms]                                      | 1006    |
| 63 | "mozambique"[All Fields]                                      | 1812    |
| 64 | 62 OR 63                                                      | 1812    |
| 65 | 39 OR 40 OR 43 OR 46 OR 49 OR 52 OR 55 OR<br>58 OR 61 OR 64   | 149,434 |
| 66 | 13 AND 38                                                     | 4113    |
| 67 | 13 AND 38 AND 65                                              | 214     |
| 68 | Limit 67 to English, French, Portuguese or<br>German language | 211     |
